# Supplementary material for: Neonatal Multisystem Inflammatory Syndrome (MIS-N) Associated with Prenatal Maternal SARS-CoV-2: A Single-Center Experience
Source: Research Square preprint supplement (doi:10.21203/rs.3.rs-7324934/v1), 2025-09-03
Supplement: Supplementary file 1 [file f0748291e7db8b5a4b554b53.docx]

Dear Editor,

We appreciate your request for the full uncropped gels and blots. However, such images are not available, as the laboratory procedures in this study consisted solely of PCR testing (positive/negative results) and the assessment of COVID immunoglobulin levels. Consequently, we are unable to provide any supplementary gel or blot images.

**Corresponding Author:**

Cansu Sivrikaya Yildirim, MD

Bursa Uludag University Medical Faculty,

Department of Pediatrics, Division of Neonatology

Gorukle, 16059, Nilufer – Bursa – Turkey

Tel: 90 224 2950527 Fax:90 224 2950511

E-mail: cansusivrikaya@uludag.edu.tr
